# Supplementary material for: PERK-mediated antioxidant response is key for pathogen persistence in ticks
Source: PubMed Central journal article supplement (PMC10597351; doi:10.1128/msphere.00321-23), 2023-09-21
Supplement: msphere.00321-23-s0006.pdf [file msphere.00321-23-s0006.pdf]

**Supplemental Table 1.** Oligonucleotide primers used in this study.

| Name                                             | Target gene    | Primer Sequences                                                           |
|--------------------------------------------------|----------------|----------------------------------------------------------------------------|
| <i>Mus musculus</i> $\beta$ -Actin (qRT-PCR)     | XM_030254057.1 | F 5'-ACGCAGAGGGAAATCGTGC GTGAC-3'<br>R 5'-ACGCGGGAGGAAGAGGATGCGGCAGTG-3'   |
| <i>Anaplasma phagocytophilum</i> 16S (qRT-PCR)   | NC_007797      | F 5'-CCCTAAGGCCTTCTCACTC-3'<br>R 5'-CAGCCACACTGGAAGTGAAGA-3'               |
| <i>Anaplasma phagocytophilum</i> 16S_full        | NC_007797      | F 5'- TCCTGGCTCAGAACGAACG-3'<br>R 5'- GTCACTGACCCAACCTTAAATGG-3'           |
| <i>Borrelia burgdorferi</i> FlaB (qRT-PCR)       | MN954474.1     | F 5'-TTGCTGATCAAGCTCAATATAACCA-3'<br>R 5'-TTGAGACCCTGAAAGTGATGC-3'         |
| <i>Ixodes scapularis</i> Actin (qRT-PCR)         | XM_029977298.1 | F 5'-GCCGGGACCTTACAGACTATC-3'<br>R 5'-CACGGACAATTTACGCTCG-3'               |
| <i>Ixodes scapularis</i> IRE1 $\alpha$ (qRT-PCR) | XM_029972190.1 | F 5'-GAGAAGGCCATCTTCGTCCG-3'<br>R 5'-GAGTAGCCTGGGCAGCATAG-3'               |
| <i>Ixodes scapularis</i> TRAF2 (qRT-PCR)         | XM_029977983.1 | F 5'-CCGCGAAAAGAACAGCTTAC-3'<br>R 5'-TACCACGTTGGACTCCTTCC-3'               |
| <i>Ixodes scapularis</i> BiP (qRT-PCR)           | XM_002433611.2 | F 5'-ATCGTGTGGTGTCTAGCGG-3'<br>R 5'-CGATACCGATGACTGTGCCG-3'                |
| <i>Ixodes scapularis</i> PERK (qRT-PCR)          | XM_029994352.4 | F 5'-ATCCACTCCTGTA CTGGGC-3'<br>R 5'-TTCACCCGATTCTGAAGGCT-3'               |
| <i>Ixodes scapularis</i> HRI (qRT-PCR)           | XM_029992945.4 | F 5'-TATTCCGAAGCTGTCTCCGC-3'<br>R 5'-GTCAGCAGGTTGTAGCCCTA-3'               |
| <i>Ixodes scapularis</i> GCN2 (qRT-PCR)          | XM_029969993.4 | F 5'-GCCCCAAGAAAGCATGACTC-3'<br>R 5'-TGCTTCGTTGGGATACTGGT-3'               |
| <i>Ixodes scapularis</i> eIF2 $\alpha$ (qRT-PCR) | XM_040212362.2 | F 5'-ATCCGGTCCATCAACAAGCT-3'<br>R 5'-TCCTTGTCACCCTGATGAC-3'                |
| <i>Ixodes scapularis</i> ATF4 (qRT-PCR)          | XM_029967345.4 | F 5'- AGTTGTCTACTGCCCGTAC-3'<br>R 5'- TCCCAGTCGACTTCCATGTC-3'              |
| <i>Borrelia burgdorferi</i> cp9 (PCR)            | BBC10          | F 5'-GAACTATTTATAATAAAAAGGAGAGC-3'<br>R 5'-ATCTTCTTCAAGATATTTTATTATAC-3'   |
| <i>Borrelia burgdorferi</i> cp26 (PCR)           | BBB19          | F 5'-AATAATTCAGGGAAAGATGGG-3'<br>R 5'-AGGTTTTTTTTGGACTTTCTGCC-3'           |
| <i>Borrelia burgdorferi</i> lp17 (PCR)           | BBD10          | F 5'-CAAAC TTATCAAATAGCTTATC-3'<br>R 5'-ACTGCCACCAAGTAATTTAAC-3'           |
| <i>Borrelia burgdorferi</i> lp25 (PCR)           | BBE16          | F 5'-ATGGGTAAAATATTATTTTTGGG-3'<br>R 5'-AAGATTGATTTTTGGCAAAAAATTTTC-3'     |
| <i>Borrelia burgdorferi</i> lp28-1 (PCR)         | BBF20          | F 5'-ATGAACAAAAATTTTCTATTTTC-3'<br>R 5'-GTTGCTTTTGCAATATGAATAGG-3'         |
| <i>Borrelia burgdorferi</i> lp28-2 (PCR)         | BBG02          | F 5'-TCCCTAGTTCTAGTATCTACTAGACCG-3'<br>R 5'-TTTTTTTTGTATGCCAATTGTATAATG-3' |
| <i>Borrelia burgdorferi</i> lp28-3 (PCR)         | BBH06          | F 5'-GATGTTAGTAGATTAATCAG-3'<br>R 5'-TAATAAAGTTTGCTTAATAGC-3'              |
| <i>Borrelia burgdorferi</i> lp28-4 (PCR)         | BBI16          | F 5'-CAGGCCGGATTTAATATCGA-3'<br>R 5'-GTTTATATTTTGACACTATAAG-3'             |
| <i>Borrelia burgdorferi</i> lp36 (PCR)           | BBK19          | F 5'-AAGTTTATGTTTATTATTGC-3'<br>R 5'-ATTGTTAGTTTTTCTTTTCC-3'               |
| <i>Borrelia burgdorferi</i> lp38 (PCR)           | BBJ34          | F 5'-AAATTCTATGGAAGTGATG-3'<br>R 5'-TTTCTATTTATTTTAGGC-3'                  |

|                                                   |                |                                                                                 |
|---------------------------------------------------|----------------|---------------------------------------------------------------------------------|
| <i>Borrelia burgdorferi</i> lp54 (PCR)            | BBA16          | F 5'-GCACAAAAGGTGCTGAG-3'<br>R 5'-TTTTAAAGCGTTTTTAAGC-3'                        |
| <i>Borrelia burgdorferi</i> lp56 (PCR)            | BBQ56          | F 5'-AAGATTGATGCAACTGGTAAAG-3'<br>R 5'-CTGACTGTAAGTATGATCC-3'                   |
| <i>Ixodes scapularis</i> eIF2 $\alpha$ _siRNA_438 | XM_040212362.2 | F 5'-AACCGGAAGACATCACGAAATCCTGTCTC-3'<br>R 5'-AAATTCGTGATGTCTTCCGGCCTGTCTC-3'   |
| <i>Ixodes scapularis</i> eIF2 $\alpha$ _scRNA     | N/A            | F 5'-AAGCATAGCGGAACCTAACAAACCTGTCTC-3'<br>R 5'-AATTGTTAGGTTCCGCTATGCCCTGTCTC-3' |
| <i>Ixodes scapularis</i> ATF4_siRNA_863           | XM_029967345.4 | F 5'-AAGCAGAGTCCTTTCCGGAAACCTGTCTC-3'<br>R 5'-AATTTCCGGAAAGGACTCTGCCCTGTCTC-3'  |
| <i>Ixodes scapularis</i> ATF4_scRNA               | N/A            | F 5'-AAGGCACAGCTTCGCAGTAATCCTGTCTC-3'<br>R 5'-AAATTAAGTGCAGGCTGTGCCCTGTCTC-3'   |
| <i>Ixodes scapularis</i> PERK_siRNA_1064          | XM_029994352.4 | F 5'-AAGCATAGAATGGAAGCCCTACCTGTCTC-3'<br>R 5'-AATAGGGCTTCCATTCTATGCCCTGTCTC-3'  |
| <i>Ixodes scapularis</i> PERK_scRNA               | N/A            | F 5'-AAGGTAACAAACCGGAGTCATCCTGTCTC-3'<br>R 5'-AAATGACTCCGGTTTGTACCCTGTCTC-3'    |
| <i>Ixodes scapularis</i> HRI_siRNA_231            | XM_029992945.4 | F 5'-AAGGATCATACTCCTGATCTTCCTGTCTC-3'<br>R 5'-AAAAGATCAGGAGTATGATCCCCTGTCTC-3'  |
| <i>Ixodes scapularis</i> HRI_scRNA                | N/A            | F 5'-AAACTATTCGTCTACTCGGTACCTGTCTC-3'<br>R 5'-AATACCGAGTAGACGAATAGTCCTGTCTC-3'  |
| <i>Ixodes scapularis</i> GCN2_siRNA_372           | XM_029969993.4 | F 5'-AACCAACACAATACACCTCAACCTGTCTC-3'<br>R 5'-AATTGAGGTGTATTGTGTTGGCCTGTCTC-3'  |
| <i>Ixodes scapularis</i> GCN2_scRNA               | N/A            | F 5'-AAACCAACATAACCATAACACCCCTGTCTC-3'<br>R 5'-AAGGTGTTATGGTATGTTGGTCCTGTCTC-3' |
| <i>Ixodes scapularis</i> Nrf2_siRNA_1058          | XM_042293400.1 | F 5'-AACCTTCATGCATGGATCCTTCCTGTCTC-3'<br>R 5'-AAAAGGATCCATGCATGAAGGCCTGTCTC-3'  |
| <i>Ixodes scapularis</i> Nrf2_scRNA               | N/A            | F 5'-AAGCTTACCGAGTCTCCTATTCCTGTCTC-3'<br>R 5'-AAAATAGGAGACTCGGTAAGCCCTGTCTC-3'  |
| <i>Ixodes scapularis</i> Nrf2 (qRT-PCR)           | XM_042293400.1 | F 5'-GTCTTCGACTTCCGGTTTGA-3'<br>R 5'-GTAGGCACTTCGGTGCTCTC-3'                    |
